# Supplementary material for: Self-assembly and the hemolysis effect of monodisperse N,N-diethylacrylamide/acrylic acid nanogels with high contents of acrylic acid
Source: Royal Society of Chemistry journal article supplement (doi:10.1039/c6sm01537a), 2016-01-01
Supplement: c6sm01537a1.pdf [file c6sm01537a1.pdf]

## Supporting Information

### Self-assembly and Hemolysis Effect of Monodisperse N,N-diethylacrylamide/Acrylic Acid Nanogels with High Contents of Acrylic Acid

Xueting Li,<sup>a</sup> Di Zhao,<sup>a</sup> Xiaodi Shi,<sup>a</sup> Gao Qiu,<sup>b</sup> and Xihua Lu\*<sup>a,b</sup>

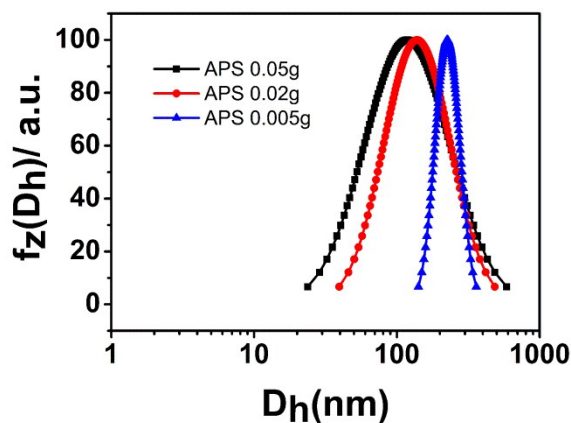

**Fig.S1** Effect of initiator on the particle size and size distribution of the P(DEA/Ac) (60%/40%, w/w) nanogels.

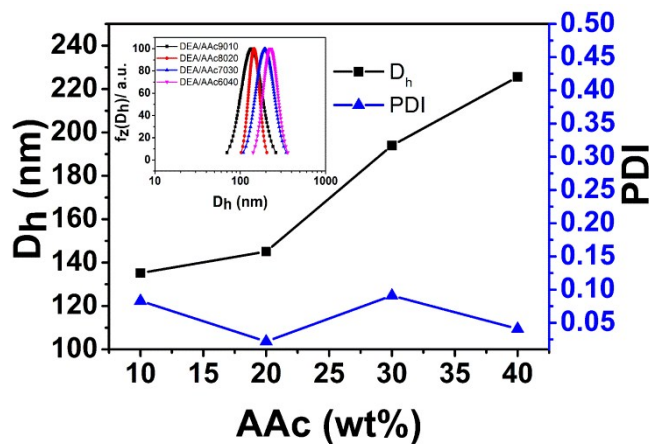

**Fig.S2** Effect of AAc monomer composition on the particle size and size distribution of the P(DEA/Ac) nanogels.
